# Supplementary material for: Determination and Comparison of Soybean Lecithin and Bovine Brain Plasmalogens Effects in Healthy Male Wistar Rats
Source: MDPI journal article supplement (doi:10.3390/ijms24087643), 2023-04-21
Supplement: s1 [file s1]

# Determination and Comparison of Soybean Lecithin and Bovine Brain Plasmalogens Effects in Healthy Male Wistar Rats

Yuliya S. Sidorova<sup>1,\*</sup>, Varuzhan A. Sarkisyan<sup>1</sup>, Nikita A. Petrov<sup>1</sup>, Yuliya V. Frolova<sup>1</sup>, Alla A. Kochetkova<sup>1</sup>

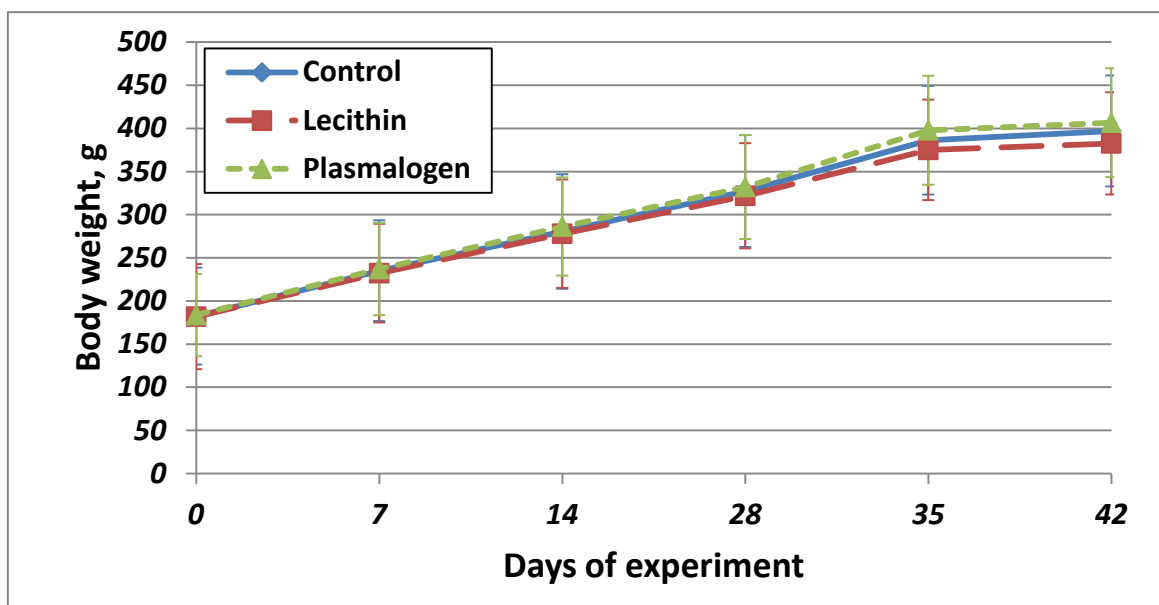

Figure S1. Dynamics of body weight, g. Values are mean  $\pm$  SEM of 16 rats per group

**Table S1.** Open field test results (before the start of the experiment)

| Group       | Open field (before the start of the experiment) |                                        |                                                       |                    |                                     |                          |
|-------------|-------------------------------------------------|----------------------------------------|-------------------------------------------------------|--------------------|-------------------------------------|--------------------------|
|             | Latency of the first move, sec                  | Latency 1st Entrance to Periphery, sec | Latency of the first entry into the central zone, sec | Number of rearings | Number of transitions between zones | The activity coefficient |
| Control     | 2.8±0.6                                         | 52±11                                  | 15±8                                                  | 8.3±0.6            | 8.9±2.1                             | 9.2±2.2                  |
| Lecithin    | 2.3±0.3                                         | 47±9                                   | 20±9                                                  | 9.0±1.4            | 8.2±1.3                             | 8.5±1.3                  |
| Plasmalogen | 2.2±0.3                                         | 46±8                                   | 21±8                                                  | 8.8±0.8            | 8.3±1.3                             | 8.6±1.3                  |

**Table S2.** Open field test results (29th day of the experiment)

| Group       | Open field (29th day of the experiment) |                                        |                                                       |                    |                                     |                          |
|-------------|-----------------------------------------|----------------------------------------|-------------------------------------------------------|--------------------|-------------------------------------|--------------------------|
|             | Latency of the first move, sec          | Latency 1st Entrance to Periphery, sec | Latency of the first entry into the central zone, sec | Number of rearings | Number of transitions between zones | The activity coefficient |
| Control     | 8.8±3.2                                 | 118±23                                 | 171±6                                                 | 4.2±1.3            | 3.5±2.0                             | 4.3±2.1                  |
| Lecithin    | 51.2±20.7* <sup>#</sup>                 | 135±17                                 | 172±8                                                 | 5.2±1.5            | 1.0±0.4 <sup>#</sup>                | 1.6±0.5* <sup>#</sup>    |
| Plasmalogen | 8.9±2.9                                 | 129±18                                 | 156±14                                                | 5.2±1.3            | 4.5±1.5                             | 4.8±1.5                  |

\*P < 0.05 versus Control; <sup>#</sup> P < 0.05 versus Plasmalogen

**Table S3.** Elevated plus maze test results (before the start of the experiment)

| Group       | Elevated plus maze test (before the start of the experiment) |                        |                          |                    |                                     |
|-------------|--------------------------------------------------------------|------------------------|--------------------------|--------------------|-------------------------------------|
|             | Time in Center, sec                                          | Time in Open Arms, sec | Time in Closed Arms, sec | Total Distance, cm | Number of transitions between zones |
| Control     | 25.1±3.9                                                     | 30.8±8.3               | 240±13                   | 1258±80            | 19±3                                |
| Lecithin    | 24.8±4.4                                                     | 30.1±4.6               | 245±7                    | 1394±70            | 21±2                                |
| Plasmalogen | 23.1±3.5                                                     | 34.5±6.5               | 242±9                    | 1320±70            | 19±2                                |

**Table S4.** Elevated plus maze test results (30th day of the experiment)

| Group       | Elevated plus maze test (30th day of the experiment) |                        |                          |                    |                                     |
|-------------|------------------------------------------------------|------------------------|--------------------------|--------------------|-------------------------------------|
|             | Time in Center, sec                                  | Time in Open Arms, sec | Time in Closed Arms, sec | Total Distance, cm | Number of transitions between zones |
| Control     | 29.6±8.2                                             | 21.7±6.0               | 249±69                   | 737±204            | 14±4                                |
| Lecithin    | 19.6±5.2                                             | 14.6±3.9               | 266±71                   | 696±186            | 14±4                                |
| Plasmalogen | 38.4±10.7                                            | 17.2±4.8               | 244±29                   | 725±201            | 15±4                                |
